# Supplementary material
Source: MDPI journal article supplement (https://www.mdpi.com/2073-4441/16/1/30)
Supplement: s1 [file s1]

## Supplementary information

### **Improvement in arsenic adsorption and calcite dissolution kinetics through size reduction of a ferric hydroxide-calcite adsorbent**

Lidia Fernandez-Rojo<sup>1</sup>, Vicenç Martí<sup>2</sup>, Irene Jubany<sup>1</sup>, Neus Bahí<sup>1</sup>, Marcel Janer<sup>3</sup>, Xavier Martínez-Lladó<sup>1</sup> and Miquel Rovira<sup>1</sup>.

<sup>1</sup>Eurecat, Centre Tecnològic de Catalunya, Sustainability Area, Plaça de la Ciència 2, 08242, Manresa, Spain

<sup>2</sup>Departament d'Enginyeria Química, Escola d'Enginyeria de Barcelona Est (EEBE), Universitat Politècnica de Catalunya, BarcelonTech (UPC), Av. Eduard Maristany 16, 08019 Barcelona, Spain

<sup>3</sup>Eurecat, Centre Tecnològic de Catalunya, Advanced Manufacturing Systems Unit, Av. Universitat Autònoma, 23, 08290 Cerdanyola del Vallès, Spain

# 1. Materials and methods: isotherm and kinetics modelling

Table S1. Initial solution characteristics, equilibrium phases and surface parameters in arsenic adsorption isotherm simulations. As(III) and As(V) simulations were run for different initial concentrations (0.0338-0.693 mol/L for As(III) and 0.0076-0.266 mol/L for As(V)) to reproduce the isotherm batch experiment, with the rest of parameters kept constant.

|                                          | As(III)                                                                                     |              | As(V)        |              |
|------------------------------------------|---------------------------------------------------------------------------------------------|--------------|--------------|--------------|
|                                          | OF-G                                                                                        | OF-S         | OF-G         | OF-S         |
| <b>Initial solution</b>                  |                                                                                             |              |              |              |
| temp                                     | 25                                                                                          | 25           | 25           | 25           |
| pH                                       | 9.2                                                                                         | 9.2          | 9.2          | 9.2          |
| pe                                       | 4                                                                                           | 4            | 4            | 4            |
| redox                                    | pe                                                                                          | pe           | pe           | pe           |
| Water (kg)                               | 0.05                                                                                        | 0.05         | 0.05         | 0.05         |
| Density (kg/dm <sup>3</sup> )            | 1                                                                                           | 1            | 1            | 1            |
| As(III) (mmol/Kg)                        | 0.0338-0.693                                                                                | 0.0364-0.693 | -            | -            |
| As(V) (mmol/Kg)                          | -                                                                                           | -            | 0.0076-0.266 | 0.0080-0.266 |
| Cl (mmol/Kg)                             | charge                                                                                      | charge       | charge       | charge       |
| Na (mmol/Kg)                             | 100                                                                                         | 100          | 100          | 100          |
| <b>Equilibrium phases</b>                |                                                                                             |              |              |              |
| <b>Ferrihydrite</b>                      |                                                                                             |              |              |              |
| Reaction and Log K                       | $\text{Fe}(\text{OH})_3 + 3\text{H}^+ = \text{Fe}^{+3} + 3\text{H}_2\text{O}$ Log K = 3.191 |              |              |              |
| Saturation index                         | 0                                                                                           | 0            | 0            | 0            |
| Moles                                    | 0.000214                                                                                    | 0.000214     | 0.000214     | 0.000214     |
| <b>Calcite</b>                           |                                                                                             |              |              |              |
| Reaction and Log K                       | $\text{CaCO}_3 = \text{Ca}^{+2} + \text{CO}_3^{-2}$ Log K = -8.48                           |              |              |              |
| Saturation index                         | 0                                                                                           | 0            | 0            | 0            |
| Moles                                    | 0.0000213                                                                                   | 0.0000213    | 0.0000213    | 0.0000213    |
| <b>Surface</b>                           |                                                                                             |              |              |              |
| Hfo <sup>a)</sup> equilibrium phase      | Ferrihydrite                                                                                | Ferrihydrite | Ferrihydrite | Ferrihydrite |
| Hfo area (m <sup>2</sup> /mol)           | 22550                                                                                       | 24901        | 22550        | 24901        |
| Hfo_wOH <sup>b)</sup> (sites mol/mol OF) | 0.12                                                                                        | 0.12         | 0.06         | 0.06         |
| Hfo_sOH <sup>c)</sup> (sites mol/mol OF) | 0.007                                                                                       | 0.007        | 0.001        | 0.001        |

a) Hfo = Hydrrous ferric oxide, assimilated to ferryhydrite ( $\text{Fe}(\text{OH})_3$ ) with a molecular weight of 106.87 g/mol.

b) wOH = weak adsorption sites

c) sOH = strong adsorption sites

Table S2. Initial solution characteristics, kinetics, equilibrium phases and surface parameters in calcite dissolution simulations.

|                                      | As(III)  |             |          |             | As(V)    |             |          |             |
|--------------------------------------|----------|-------------|----------|-------------|----------|-------------|----------|-------------|
|                                      | OF-G     |             | OF-S     |             | OF-G     |             | OF-S     |             |
|                                      | Acid pH  | Alkaline pH |
| <b>Initial solution</b>              |          |             |          |             |          |             |          |             |
| temp                                 | 25       | 25          | 25       | 25          | 25       | 25          | 25       | 25          |
| pH                                   | 4        | 9.2         | 4        | 9.2         | 4        | 9.2         | 4        | 9.2         |
| pe                                   | 4        | 4           | 4        | 4           | 4        | 4           | 4        | 4           |
| redox                                | pe       | pe          | pe       | pe          | pe       | pe          | pe       | pe          |
| Water (kg)                           | 0.05     | 0.05        | 0.05     | 0.05        | 0.05     | 0.05        | 0.05     | 0.05        |
| Density (kg/dm <sup>3</sup> )        | 1        | 1           | 1        | 1           | 1        | 1           | 1        | 1           |
| As(III) (mmol/Kg)                    | 0.33     | 0.33        | 0.33     | 0.33        | -        | -           | -        | -           |
| As(V) (mmol/Kg)                      | -        | -           | -        | -           | 0.33     | 0.33        | 0.33     | 0.33        |
| Cl (mmol/Kg)                         | charge   | charge      | charge   | charge      | charge   | charge      | charge   | charge      |
| Na (mmol/Kg)                         | 100      | 100         | 100      | 100         | 100      | 100         | 100      | 100         |
| <b>Kinetics-calcite<sup>a)</sup></b> |          |             |          |             |          |             |          |             |
| Current moles                        | 2.13E-05 | 2.13E-05    | 2.13E-05 | 2.13E-05    | 2.13E-05 | 2.13E-05    | 2.13E-05 | 2.13E-05    |
| Initial moles                        | 2.13E-05 | 2.13E-05    | 2.13E-05 | 2.13E-05    | 2.13E-05 | 2.13E-05    | 2.13E-05 | 2.13E-05    |
| Area (cm <sup>2</sup> /mol)          | 2.50E+05 | 2.50E+05    | 5.00E+05 | 5.00E+05    | 2.50E+05 | 2.50E+05    | 5.00E+05 | 5.00E+05    |
| Exponential factor                   | 0.6      | 0.6         | 0.6      | 0.6         | 0.6      | 0.6         | 0.6      | 0.6         |

a) Rate equation defined by Plummer *et al.* (1978)

## 2. Adsorbent characterization

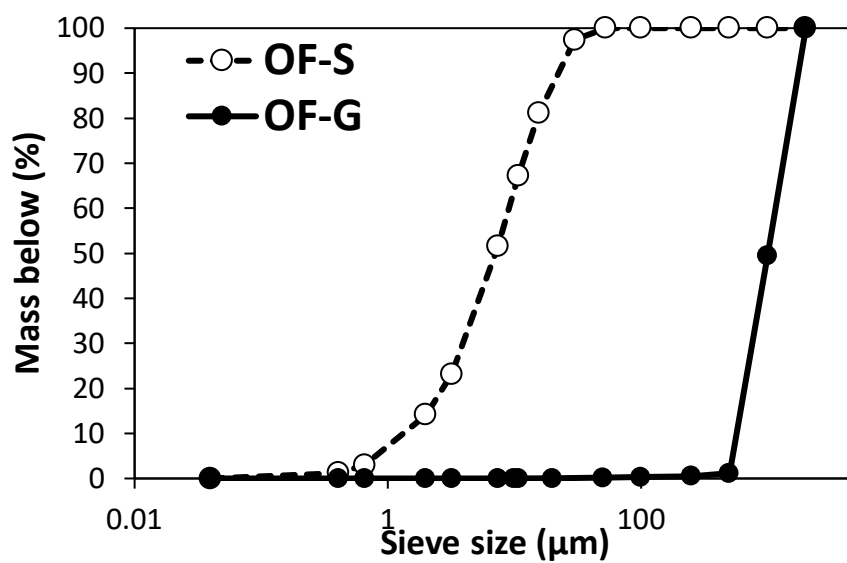

Figure S1. Particle Size Distribution of OF-G and OF-S.

a)OF-G

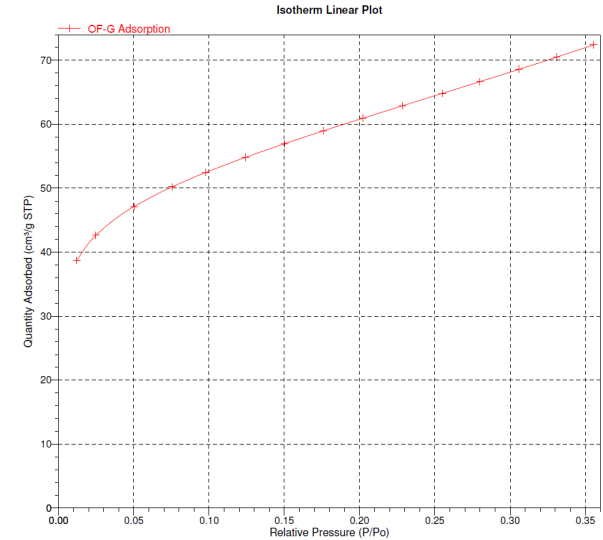

**BET Surface Area Report**

BET Surface Area:  $217.9597 \pm 0.3397 \text{ m}^2/\text{g}$   
Slope:  $0.019847 \pm 0.000031 \text{ g/cm}^3 \text{ STP}$   
Y-Intercept:  $0.000125 \pm 0.000004 \text{ g/cm}^3 \text{ STP}$   
C: 159.779465  
Qm: 50.0689 cm³/g STP  
Correlation Coefficient: 0.9999952  
Molecular Cross-Sectional Area: 0.1620 nm²

| Relative Pressure (P/Po) | Quantity Adsorbed (cm³/g STP) | 1/[Q(Po/P - 1)] |
|--------------------------|-------------------------------|-----------------|
| 0.050128697              | 47.1285                       | 0.001120        |
| 0.075283446              | 50.1969                       | 0.001622        |
| 0.097877120              | 52.4743                       | 0.002068        |
| 0.124169580              | 54.8218                       | 0.002586        |
| 0.150138824              | 56.9534                       | 0.003102        |
| 0.175869166              | 58.9600                       | 0.003619        |

b) OF-S

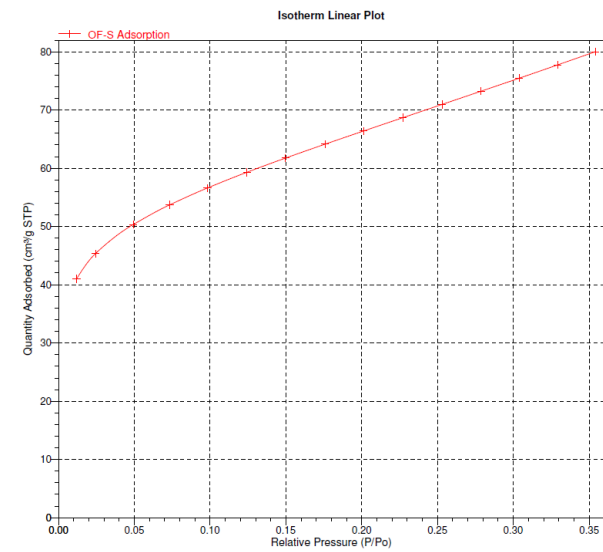

**BET Surface Area Report**

BET Surface Area:  $233.4484 \pm 1.3524 \text{ m}^2/\text{g}$   
Slope:  $0.018556 \pm 0.000106 \text{ g/cm}^3 \text{ STP}$   
Y-Intercept:  $0.000092 \pm 0.000021 \text{ g/cm}^3 \text{ STP}$   
C: 203.506954  
Qm: 53.6269 cm³/g STP  
Correlation Coefficient: 0.9998530  
Molecular Cross-Sectional Area: 0.1620 nm²

| Relative Pressure (P/Po) | Quantity Adsorbed (cm³/g STP) | 1/[Q(Po/P - 1)] |
|--------------------------|-------------------------------|-----------------|
| 0.049335465              | 50.3437                       | 0.001031        |
| 0.073410528              | 53.7244                       | 0.001475        |
| 0.098252962              | 56.6146                       | 0.001925        |
| 0.124294770              | 59.3082                       | 0.002393        |
| 0.149732375              | 61.7507                       | 0.002852        |
| 0.175753265              | 64.1264                       | 0.003325        |
| 0.201308672              | 66.4018                       | 0.003796        |
| 0.227167052              | 68.6846                       | 0.004280        |
| 0.252957022              | 70.9552                       | 0.004772        |
| 0.278667338              | 73.2230                       | 0.005276        |
| 0.303913502              | 75.4625                       | 0.005786        |

Figure S2. BET isotherms and surface area reports for a) OF-G and b) OF-S.

**OF-G**

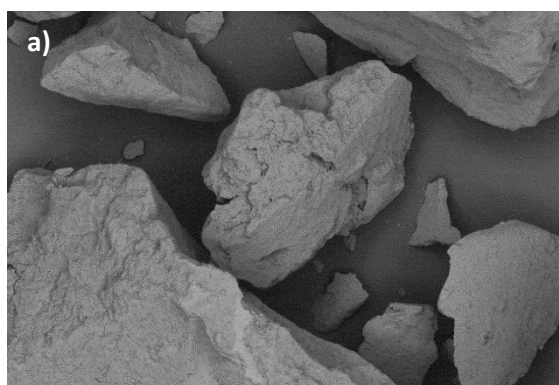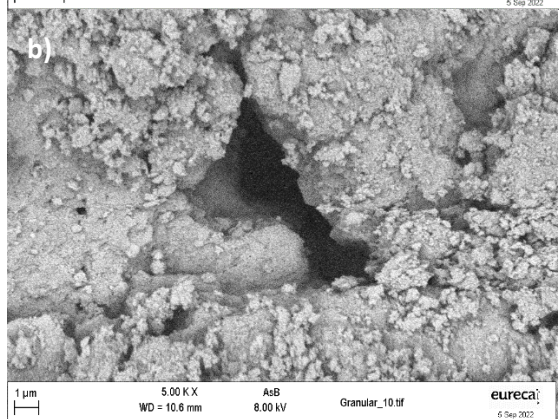

**OF-S**

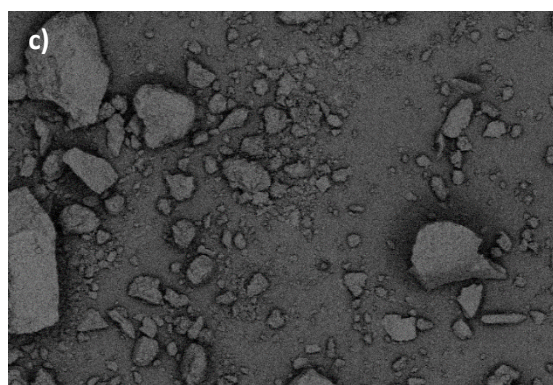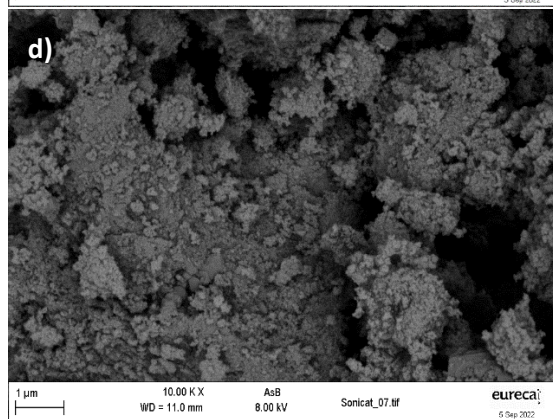

*Figure S3. SEM images of a,b) OF-G and c,d) OF-S at different magnifications.*

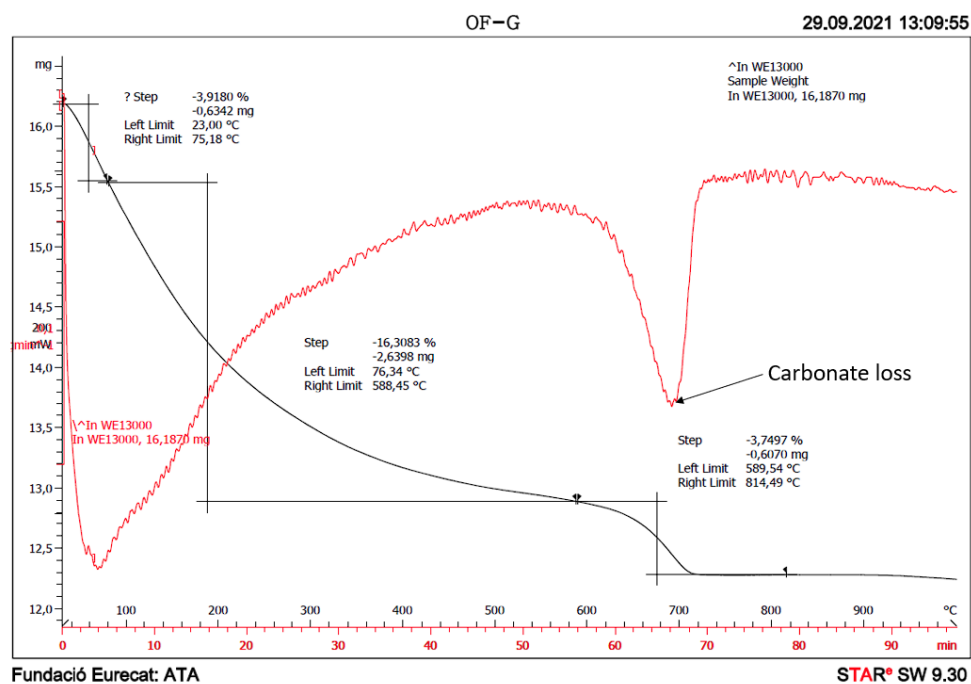

Figure S4. Thermogravimetric analysis of OF-G.

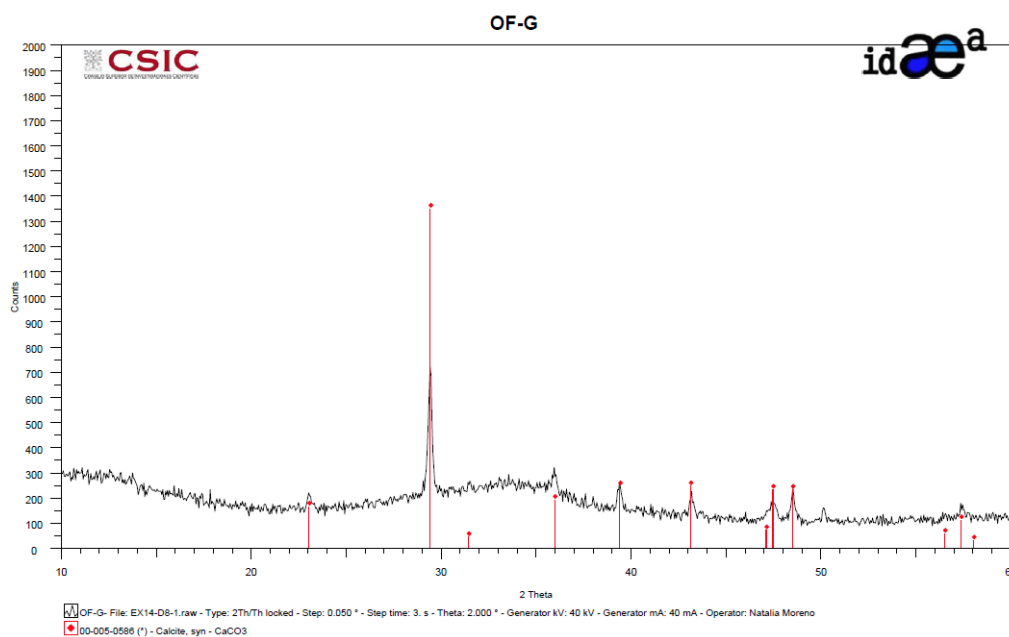

Figure S5. XRD diffractogram of OF-G sample.

### 3. pH evolution due to calcite dissolution

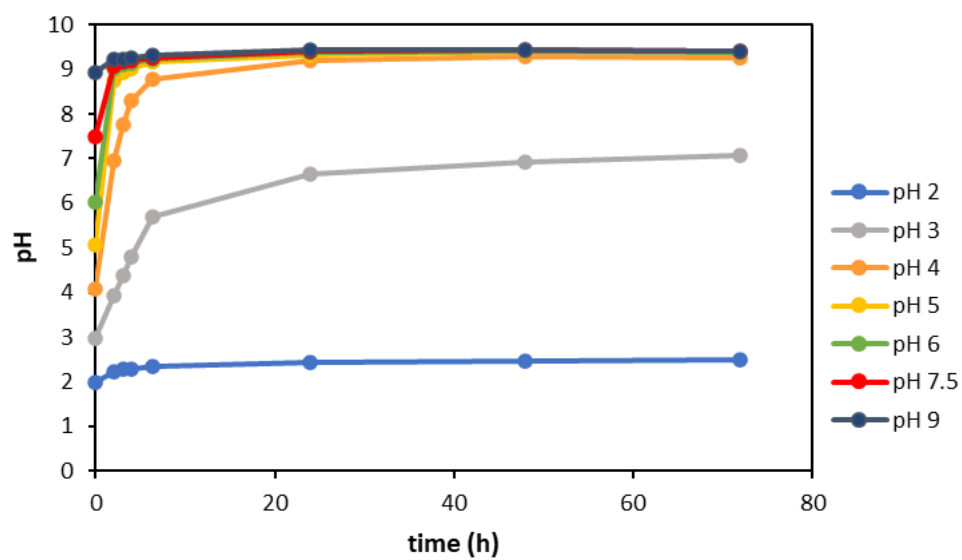

Figure S6. pH variation in batch experiment with OF-G sample and a synthetic water at initial pH from 2 to 9.

## 4. Arsenic adsorption equilibrium

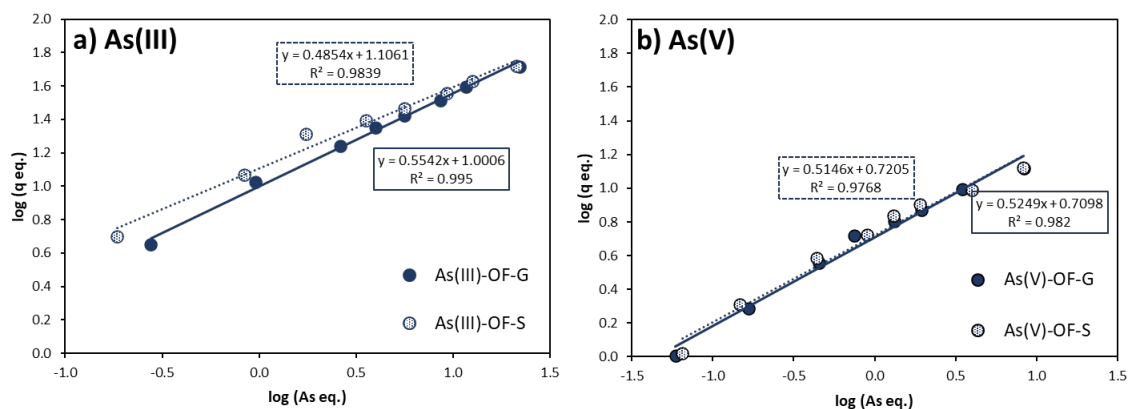

Figure S7. Fitting of experimental data with the linearization of Freundlich equation for a) As(III) and b) As(V).

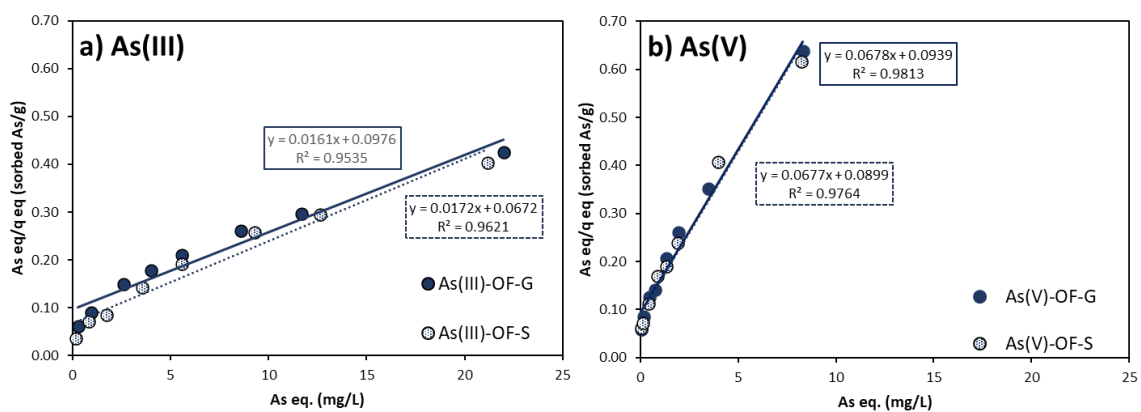

Figure S8. Fitting of experimental data with the linearization of Langmuir equation for a) As(III) and b) As(V).

## 5. Arsenic adsorption kinetics

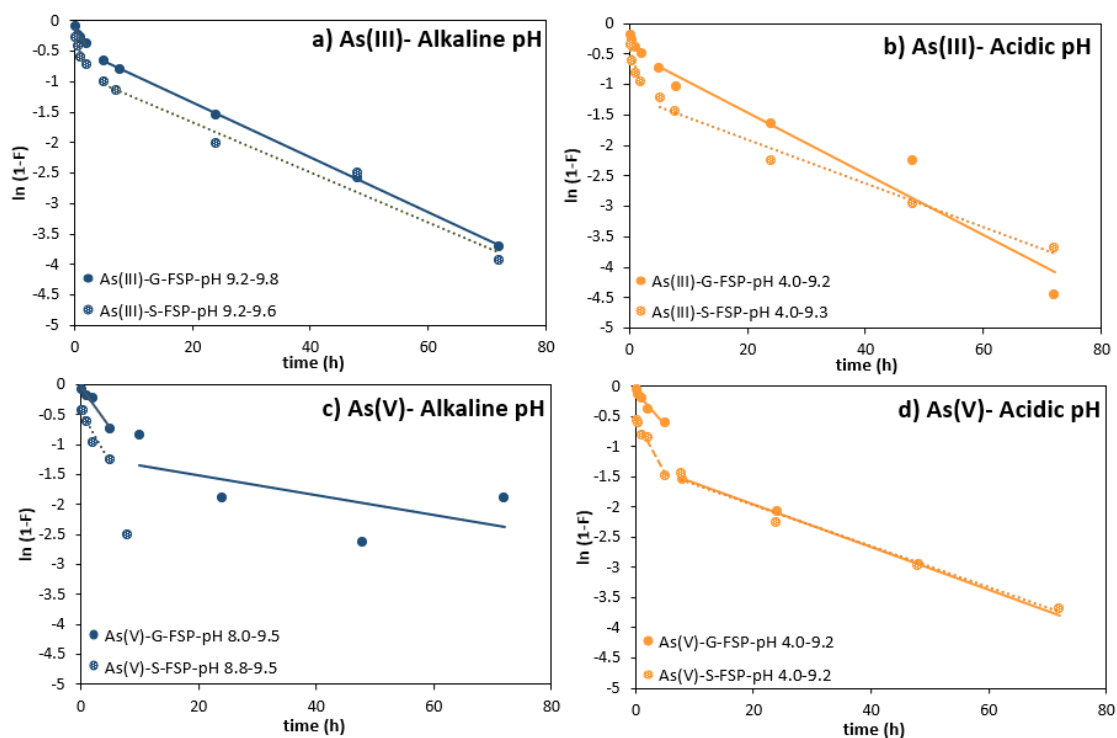

Figure S9. Film diffusion mass transfer models and linear adjustments for As(III) and As(V) experiments. Solid lines correspond to OF-G and dotted lines to OF-S linear adjustments. a) As(III) adsorption at alkaline pH, b) As(III) adsorption at acidic pH, c) As(V) adsorption at alkaline pH, d) As(V) adsorption at acidic pH.

Table S3. Absolute values of constants of the adjusted film-diffusion mass transfer models.

|             |                 | As(III) |        | As(V)  |        |
|-------------|-----------------|---------|--------|--------|--------|
|             |                 | OF-G    | OF-S   | OF-G   | OF-S   |
| Alkaline pH | $K_{fd1}$ (1/h) | 0.1386  | 0.2357 | 0.1375 | 0.1777 |
|             | $R^2$           | 0.88    | 0.91   | 0.96   | 0.92   |
|             | $K_{fd2}$ (1/h) | 0.045   | 0.0411 | 0.0166 | -*     |
|             | $R^2$           | 0.99    | 0.97   | 0.38   | -      |
| Acid pH     | $K_{fd1}$ (1/h) | 0.1489  | 0.3127 | 0.1091 | 0.1838 |
|             | $R^2$           | 0.94    | 0.87   | 0.94   | 0.98   |
|             | $K_{fd2}$ (1/h) | 0.0503  | 0.0359 | 0.0354 | 0.0339 |
|             | $R^2$           | 0.94    | 0.98   | 0.99   | 0.99   |

$K_{fd1}$ : film diffusion constant

$K_{fd2}$ : pore diffusion constant

$R^2$ : coefficient of determination

\*This constant could not be calculated since  $q_e$  was lower than the adsorbed As in intermediate points

# 6. Calcite dissolution kinetics

Table S4. Measured calcium release rates in the medium for the first 5 h (data from Fig. 3).

|                                        | As(III)       |           | As(V)         |           |
|----------------------------------------|---------------|-----------|---------------|-----------|
|                                        | OF-G          | OF-S      | OF-G          | OF-S      |
| Alkaline pH (mg/L/s $\times 10^{-3}$ ) | 0.8 $\pm$ 0.4 | 2 $\pm$ 3 | 0.5 $\pm$ 0.5 | 2 $\pm$ 2 |
| Acid pH (mg/L/s $\times 10^{-3}$ )     | 0.8 $\pm$ 0.6 | 2 $\pm$ 3 | 1.0 $\pm$ 0.8 | 3 $\pm$ 5 |

# 7. Environmental significance

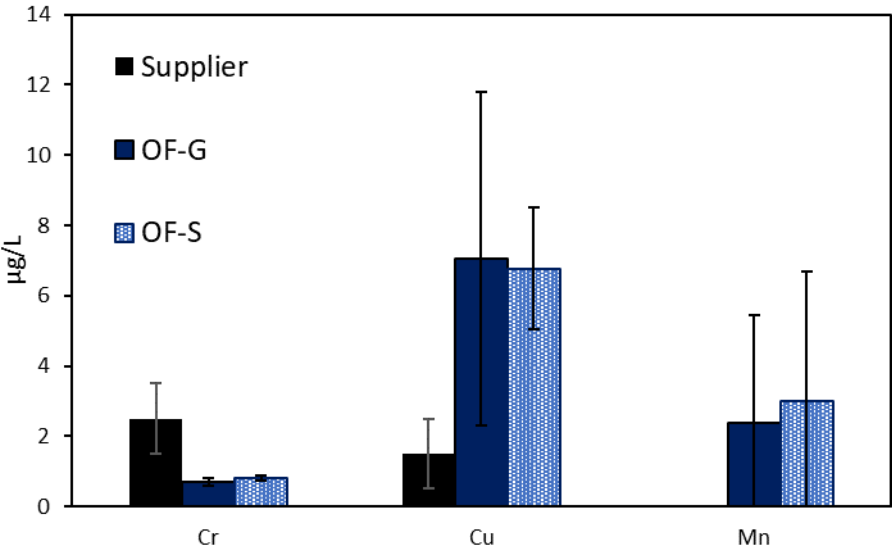

Figure S10. Traces released during the arsenic adsorption experiments.
